# Supplementary material
Source: PubMed Central journal article supplement (PMC8239056)
Supplement: NIHMS1676113-supplement-Supplementary_Table_S1.pdf [file NIHMS1676113-supplement-Supplementary_Table_S1.pdf]

**Supplementary Table S1:** Unadjusted and adjusted cox hazard model for hazard of post-transplant death, by early/late evaluation (use 30 days as cutoff)

**Table S1:** Univariate and multivariate cox hazard model for post-transplant death, by early ( $\leq 30$  days) versus late ( $>30$  days) time from referral to evaluation

| Parameter                                 | Value                | Univariable       |        | Multivariable     |        |
|-------------------------------------------|----------------------|-------------------|--------|-------------------|--------|
|                                           |                      | HR (95%CI)        | P      | aHR (95%CI)       | P      |
| Time from referral to evaluation          | Late Evaluation      | REF               |        | REF               |        |
|                                           | Early Evaluation     | 2.24 (0.79,6.39)  | 0.1313 | 1.88 (0.72,4.90)  | 0.1982 |
| Age                                       | Age at Referral      | 1.05 (0.98,1.11)  | 0.1512 | 1.03 (0.96,1.10)  | 0.4069 |
| Center                                    | Station 1            | REF               |        | REF               |        |
|                                           | Station 2            | 0.56 (0.14,2.22)  | 0.4049 | 0.76 (0.15,3.75)  | 0.7309 |
|                                           | Station 3            | 0.77 (0.25,2.39)  | 0.6530 | 1.15 (0.33,3.98)  | 0.8253 |
|                                           | Station 4            | 0.45 (0.13,1.55)  | 0.2070 | 0.56 (0.13,2.33)  | 0.4217 |
|                                           | Station 5            | 0.20 (0.04,1.09)  | 0.0628 | 0.21 (0.04,1.12)  | 0.0678 |
|                                           | Station 6            | 0.27 (0.06,1.23)  | 0.0905 | 0.31 (0.04,2.15)  | 0.2354 |
| Etiology                                  | NAFLD                | REF               |        | REF               |        |
|                                           | Autoimmune hepatitis | 3.64 (0.33,40.25) | 0.2915 | 6.00 (0.82,44.18) | 0.0784 |
|                                           | Alcohol              | 0.89 (0.18,4.38)  | 0.8807 | 1.12 (0.19,6.69)  | 0.8988 |
|                                           | HBV                  | 2.39 (0.34,16.98) | 0.3834 | 6.17 (0.64,59.19) | 0.1150 |
|                                           | HCV                  | 1.75 (0.38,7.99)  | 0.4698 | 2.08 (0.33,13.03) | 0.4364 |
|                                           | HCV + Alcohol        | 0.98 (0.22,4.43)  | 0.9818 | 1.05 (0.18,6.12)  | 0.9586 |
| Gender                                    | Male                 | REF               |        | REF               |        |
|                                           | Female               | 1.84 (0.25,13.45) | 0.5498 | 2.84 (0.58,13.89) | 0.1977 |
| Race/Ethnicity                            | White                | REF               |        | REF               |        |
|                                           | Black                | 1.42 (0.57,3.56)  | 0.4519 | 1.71 (0.55,5.29)  | 0.3506 |
|                                           | Other                | 1.31 (0.18,9.82)  | 0.7904 | 3.18 (0.41,24.41) | 0.2660 |
|                                           | Hispanic / Latino    | 2.08 (0.78,5.56)  | 0.1461 | 2.92 (0.88,9.74)  | 0.0814 |
|                                           | Unknown              | 0.62 (0.08,4.66)  | 0.6455 | 0.95 (0.11,7.97)  | 0.9633 |
| Diabetes at referral                      | No                   | REF               |        | REF               |        |
|                                           | Yes                  | 2.43 (0.74,7.97)  | 0.1437 | 2.72 (0.66,11.17) | 0.1664 |
| Tobacco Use at Diagnosis of Cirrhosis     | Never smoker         | REF               |        | REF               |        |
|                                           | Current smoker       | 1.29 (0.56,2.95)  | 0.5461 | 1.13 (0.44,2.88)  | 0.7992 |
|                                           | Former smoker        | 1.20 (0.45,3.22)  | 0.7184 | 1.50 (0.51,4.41)  | 0.4589 |
|                                           | Unknown              | 4.27 (0.54,33.72) | 0.1689 | 3.78 (0.2,71.33)  | 0.3756 |
| Cirrhosis comorbidity index at referral   | 0                    | REF               |        | REF               |        |
|                                           | 1+0                  | 0.45 (0.13,1.48)  | 0.1878 | 0.48 (0.15,1.56)  | 0.2218 |
|                                           | 1+1                  | 0.79 (0.11,5.87)  | 0.8210 | 0.88 (0.18,4.41)  | 0.8751 |
|                                           | 3+0                  | 0.93 (0.13,6.86)  | 0.9412 | 1.14 (0.10,12.43) | 0.9174 |
|                                           | 3+1                  | 2.53 (0.60,10.71) | 0.2085 | 1.82 (0.51,6.51)  | 0.3581 |
| Liver cancer at referral                  | No                   | REF               |        | REF               |        |
|                                           | Yes                  | 1.60 (0.78,3.28)  | 0.1977 | 1.41 (0.22,9.22)  | 0.7204 |
| Disease within Milan criteria at referral | No                   | REF               |        | REF               |        |
|                                           | Yes                  | 1.06 (0.14,7.95)  | 0.9522 | 1.12 (0.19,6.73)  | 0.9002 |
